# Supplementary material
Source: ML conference proceedings conference paper supplement (https://openreview.net/forum?id=H5LUOwUoql5)
Supplement: supplementary_material [file attachment]

# Decision-Theoretic Planning with Communication in Open Multiagent Systems (Supplementary material)

Anirudh Kakarlapudi<sup>1</sup>

Gayathri Anil<sup>1</sup>

Adam Eck<sup>2</sup>

Prashant Doshi<sup>1</sup>

Leen-Kiat Soh<sup>3</sup>

<sup>1</sup>Computer Science Department, University of Georgia, Athens, Georgia, USA

<sup>2</sup>Computer Science Department, Oberlin College, Oberlin, Ohio, USA

<sup>3</sup>Computer Science and Engineering Department, University of Nebraska, Lincoln, Nebraska, USA

## A MONTE CARLO TREE SEARCH

Here, we provide the pseudocode for single agent POMCP Silver and Veness [2010] in Alg 2, as well as an example AND-OR tree in Fig. 5 referenced in Section 4.1.

---

### Algorithm 2 POMCP [Silver and Veness, 2010]

---

```

1: procedure CREATEPLAN( $b$ )
2:   for  $traj \in 1, 2, \dots, \tau$  do
3:      $s \leftarrow \text{SampleParticle}(b)$ 
4:     UpdateTree( $s, 0, \varepsilon$ )
5:   return  $\operatorname{argmax}_{a \in A} Q(\varepsilon, a)$ 
6: procedure UPDATETREE( $s, t, h$ )
7:   if  $t \geq H$  then
8:     return 0
9:   if  $h$  is a leaf then
10:    Expand( $h$ )
11:   return Rollout( $s, t$ )
12:    $a^* \leftarrow \text{ChooseAction}(h)$ 
13:    $s', r, o \leftarrow \text{SimulateComm}(s, a)$ 
14:    $R \leftarrow r + \gamma * \text{UpdateTree}(s', t + 1, hao)$ 
15:   StoreResults( $h, s, a, R$ )
16:   return  $R$ 
17: procedure EXPAND( $h$ )
18:    $B(h) \leftarrow \emptyset, n(h) \leftarrow 0$ 
19:    $n(ha) \leftarrow 0, Q(h, a) \leftarrow 0 \forall a \in A$ 
20: procedure CHOOSEACTION( $h$ )
21:   return  $\operatorname{argmax}_{a \in A} Q(h, a) + \sqrt{\frac{\log n(h)}{n(ha)}}$ 
22: procedure STORERESULTS( $h, s, a, R$ )
23:    $B(h) \leftarrow B(h) \cup \{s\}$ 
24:    $n(h) \leftarrow n(h) + 1, n(ha) \leftarrow n(ha) + 1$ 
25:    $Q(h, a) \leftarrow Q(h, a) + \frac{R - Q(h, a)}{n(ha)}$ 

```

---

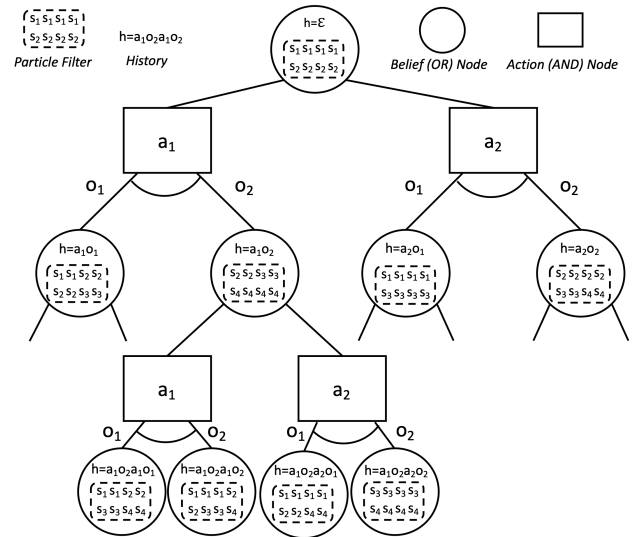

Figure 5: The first two levels of an example AND-OR tree created by MCTS for a POMDP with 2 actions, 2 observations, and 4 states

## B AGENT ACTIONS PERFORMED IN EXPERIMENTS

In Figs. 6-14, we document the actions chosen by each agent in all three setups for both the I-POMCP-PF<sub>O</sub> and CI-POMCP-PF<sub>O</sub> algorithms (using communication costs of 0 and 1 to show both ends of the spectrum). Note: for all setups, action 0 = the left most fire, action 1 = the middle fire, action 2 = the right fire, and action 3 = NOOP.

## C MESSAGES SENT IN EXPERIMENTS

In Figs. 15-22, we document the messages sent by each agent in all three setups for CI-POMCP-PF<sub>O</sub> algorithms (using communication costs of 0 and 1 to show both ends of the spectrum).

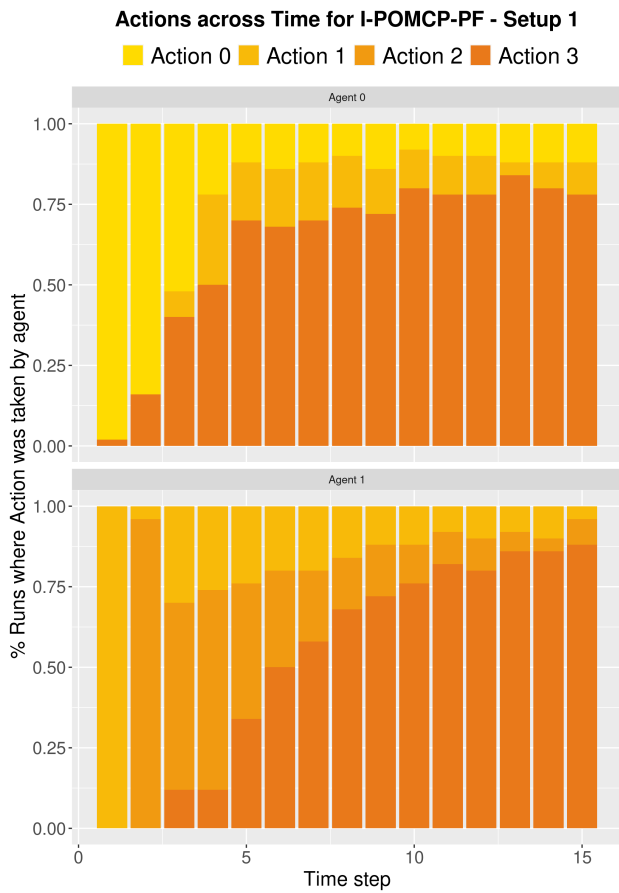

Figure 6: Agent actions using I-POMCP-PF in Setup 1

**References**

David Silver and Joel Veness. Monte-carlo planning in large pomdps. In *23rd International Conference on Neural Information Processing Systems (NIPS)*, NIPS'10, pages 2164–2172, 2010.

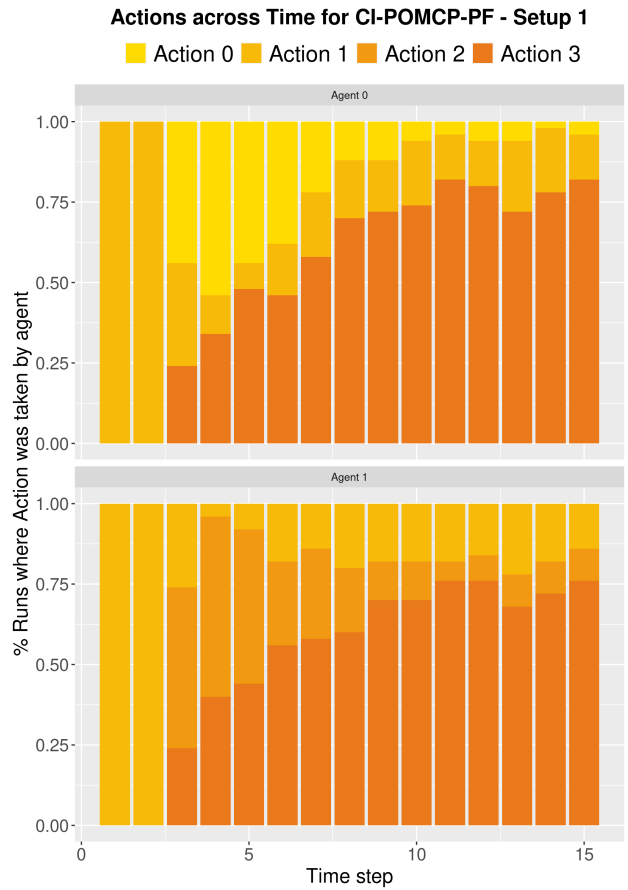

Figure 7: Agent actions using CI-POMCP-PF (cost = 0) in Setup 1

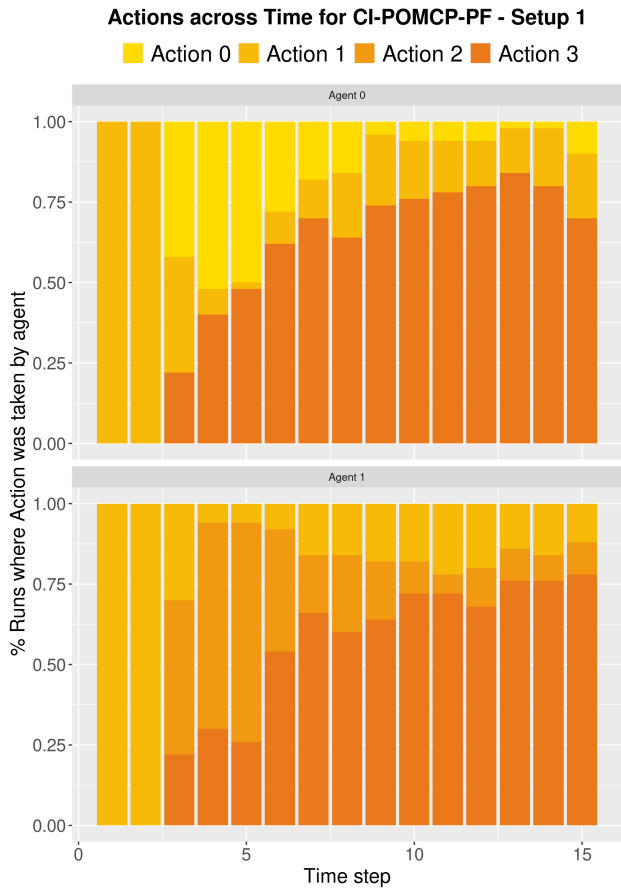

Figure 8: Agent actions using CI-POMCP-PF (cost = 1) in Setup 1

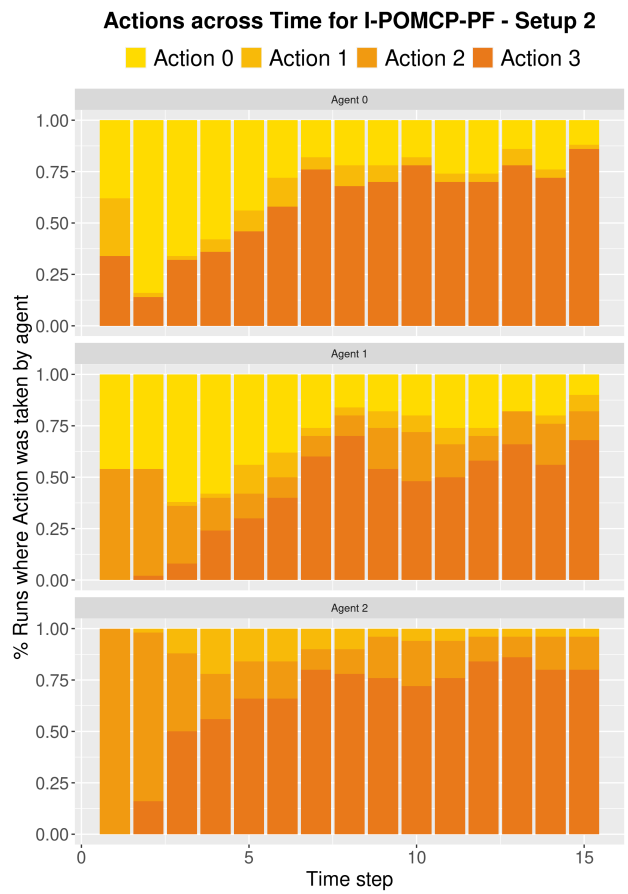

Figure 9: Agent actions using I-POMCP-PF in Setup 2

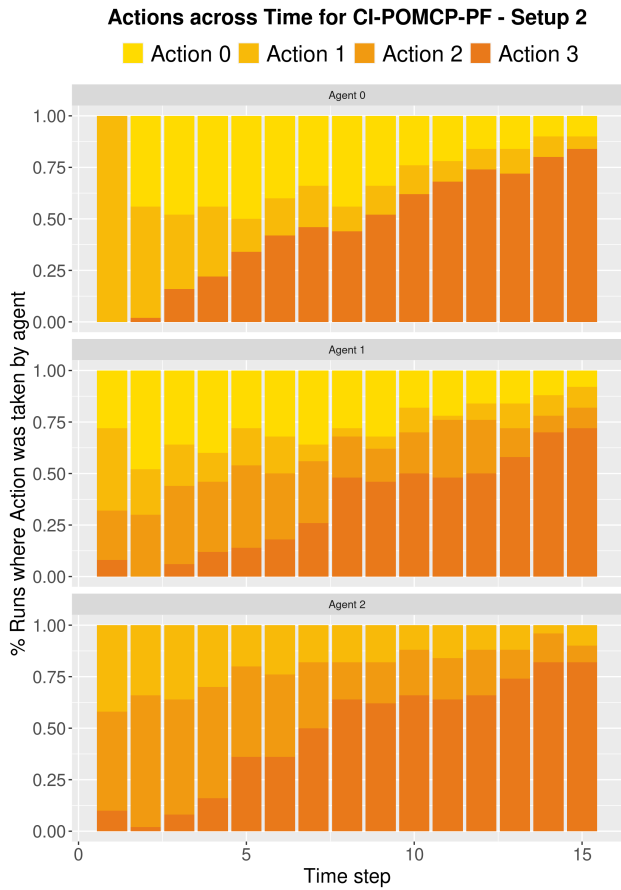

Figure 10: Agent actions using CI-POMCP-PF (cost = 0) in Setup 2

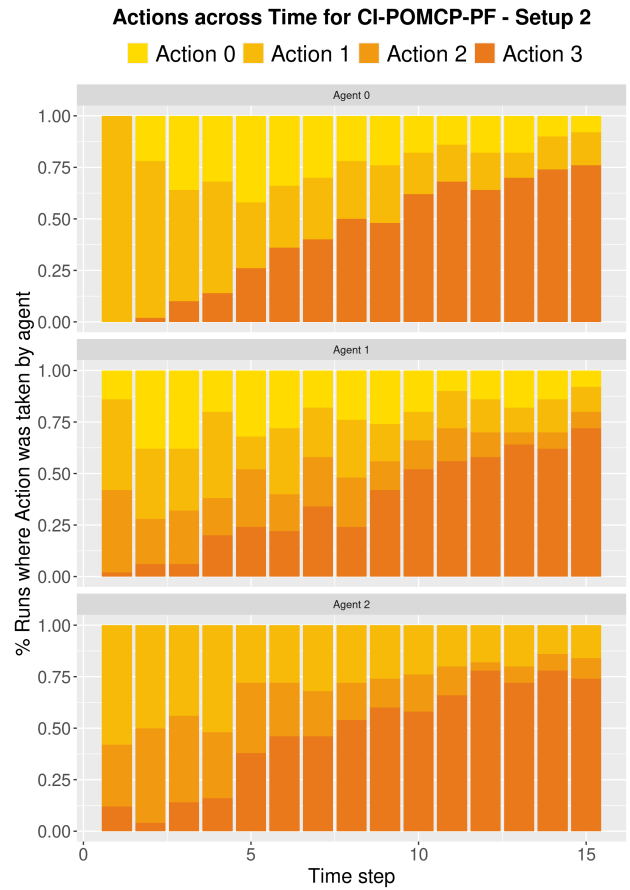

Figure 11: Agent actions using CI-POMCP-PF (cost = 1) in Setup 2

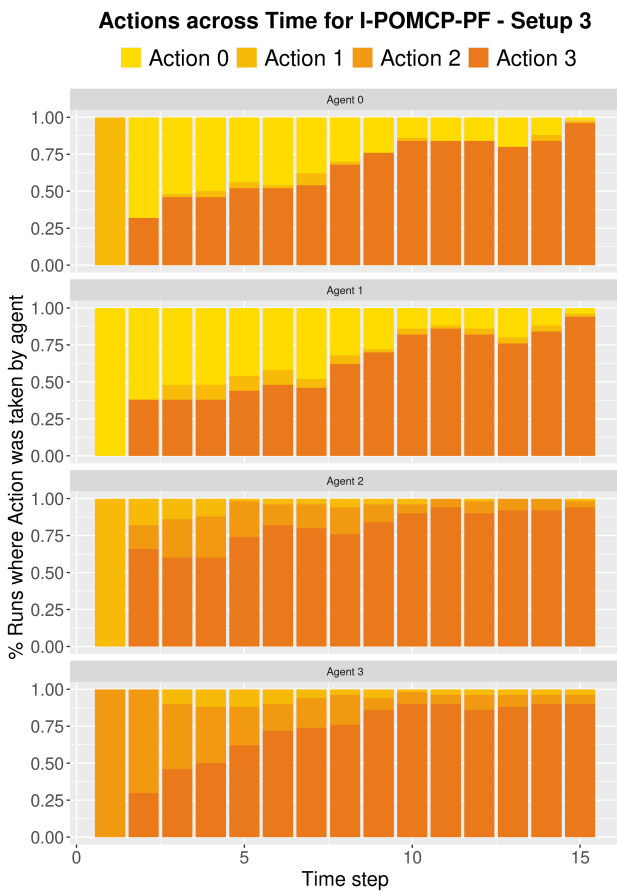

Figure 12: Agent actions using I-POMCP-PF in Setup 3

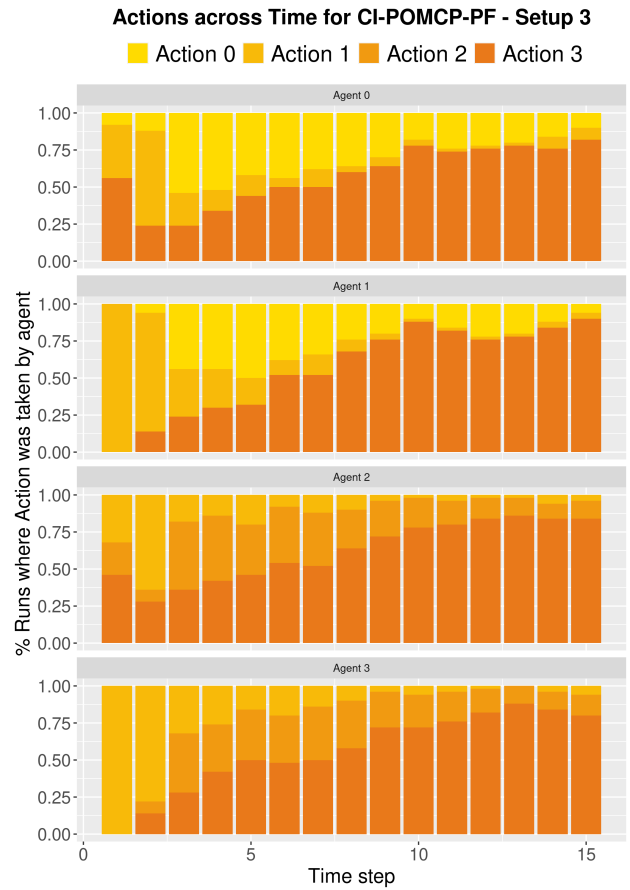

Figure 13: Agent actions using CI-POMCP-PF (cost = 0) in Setup 3

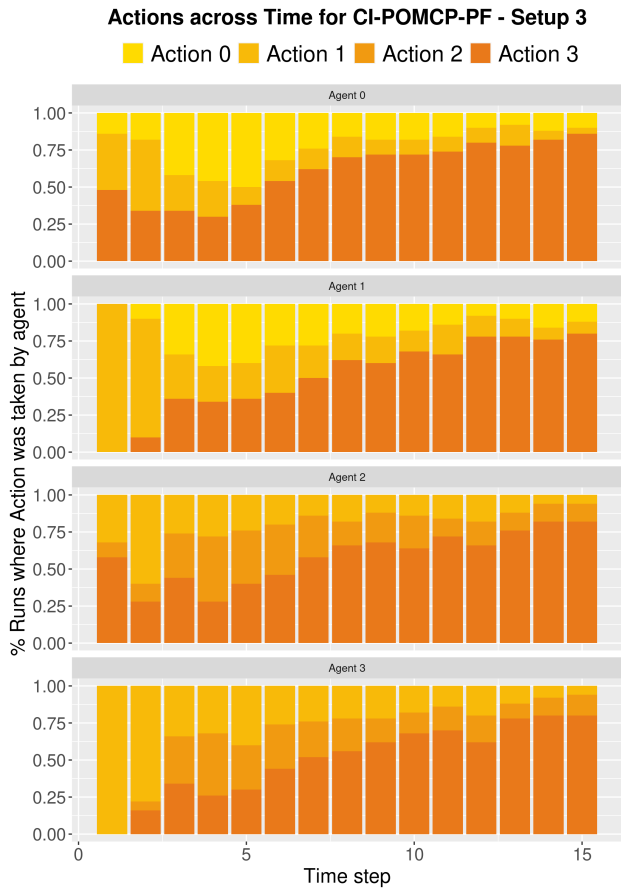

Figure 14: Agent actions using CI-POMCP-PF (cost = 1) in Setup 3

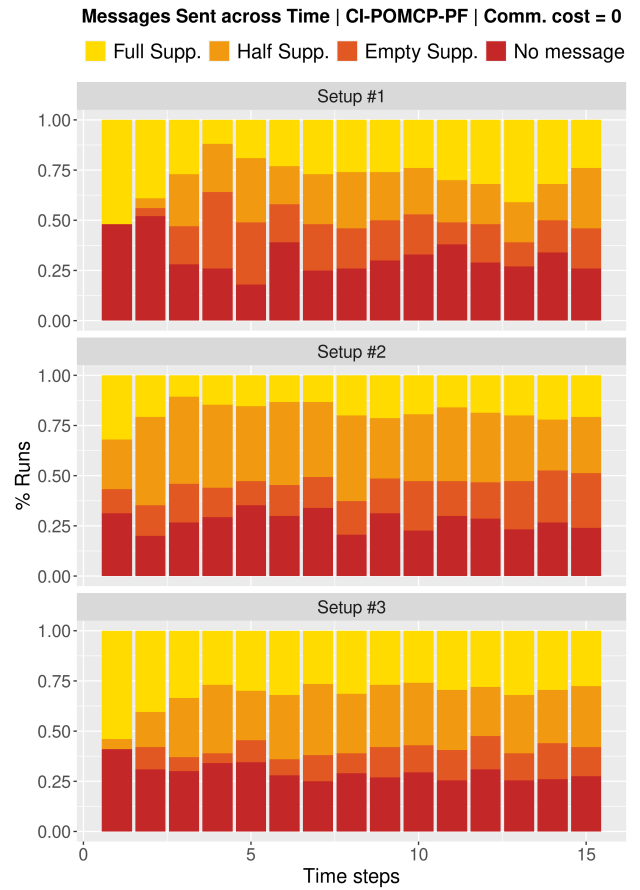

Figure 15: Messages sent using CI-POMCP-PF (cost = 0) in Setups 1-3

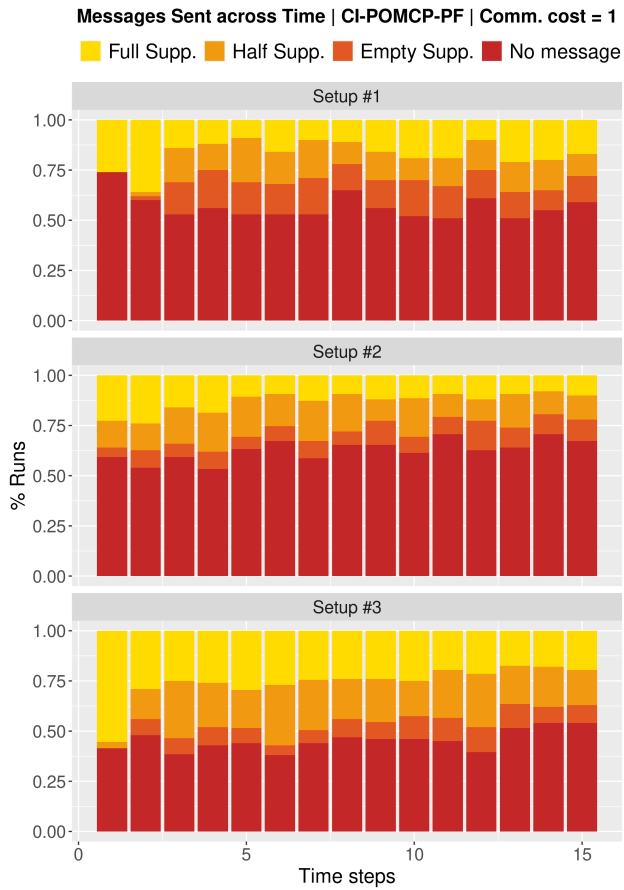

Figure 16: Messages sent using CI-POMCP-PF (cost = 1) in Setups 1-3

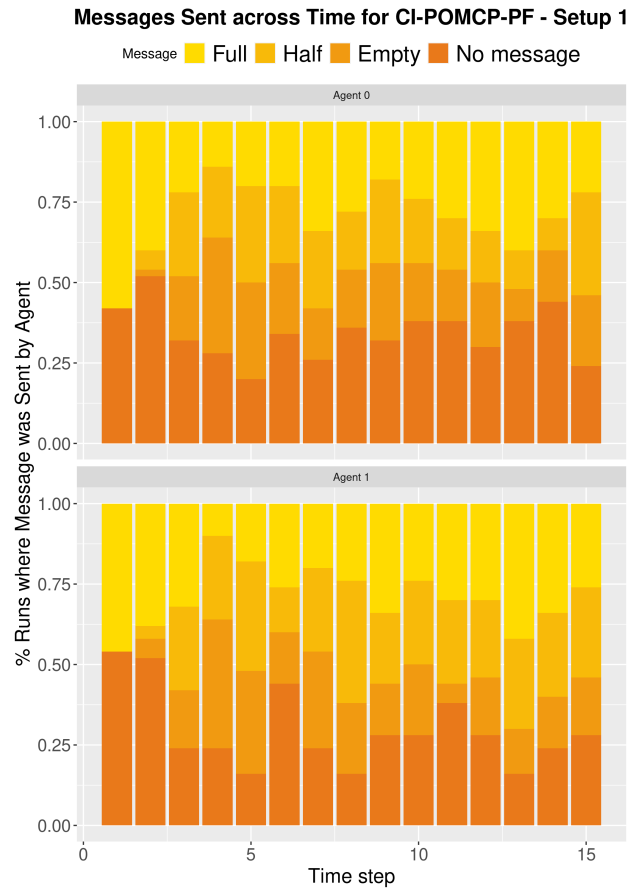

Figure 17: Messages sent using CI-POMCP-PF (cost = 0) in Setup 1

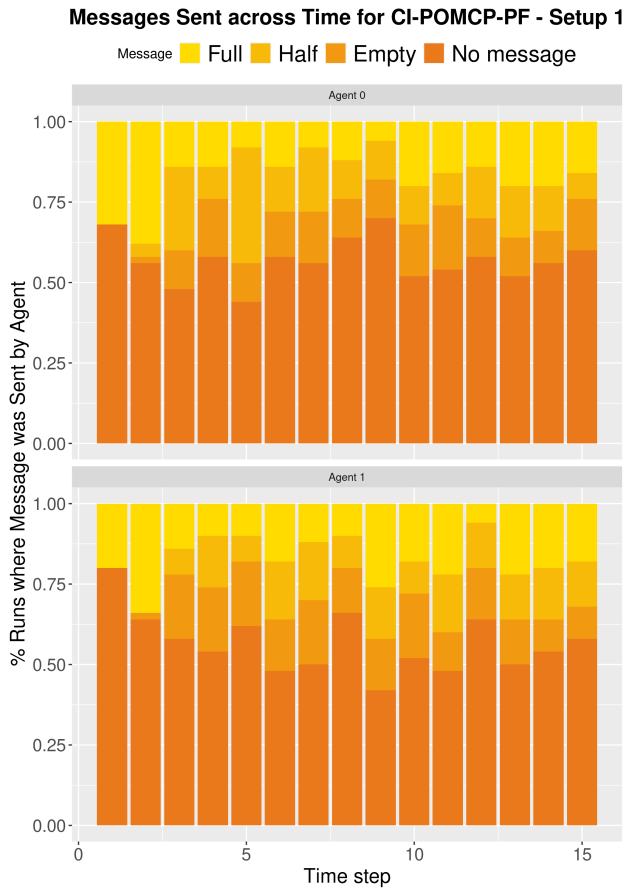

Figure 18: Messages sent using CI-POMCP-PF (cost = 1) in Setup 1

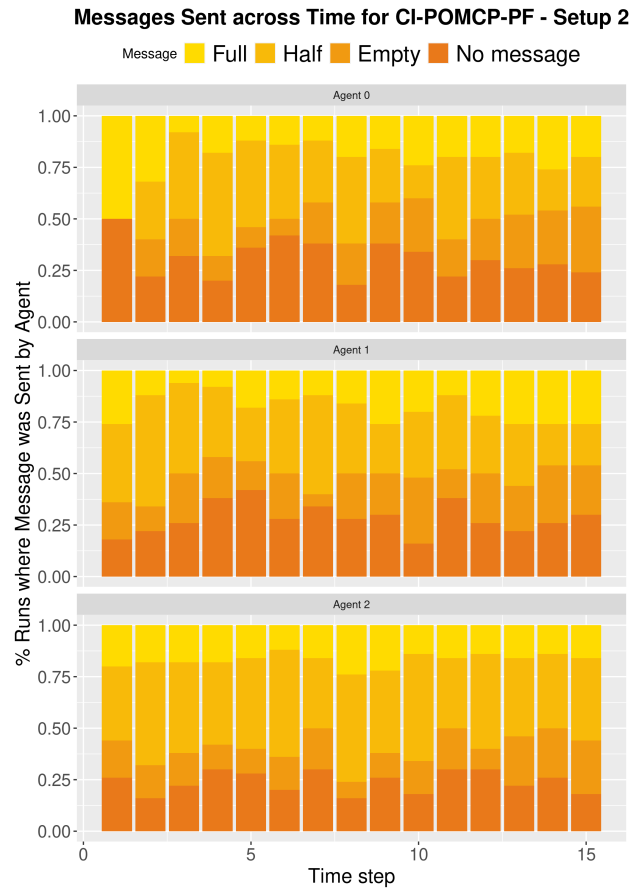

Figure 19: Messages sent using CI-POMCP-PF (cost = 0) in Setup 2



Messages Sent across Time for CI-POMCP-PF - Setup 2

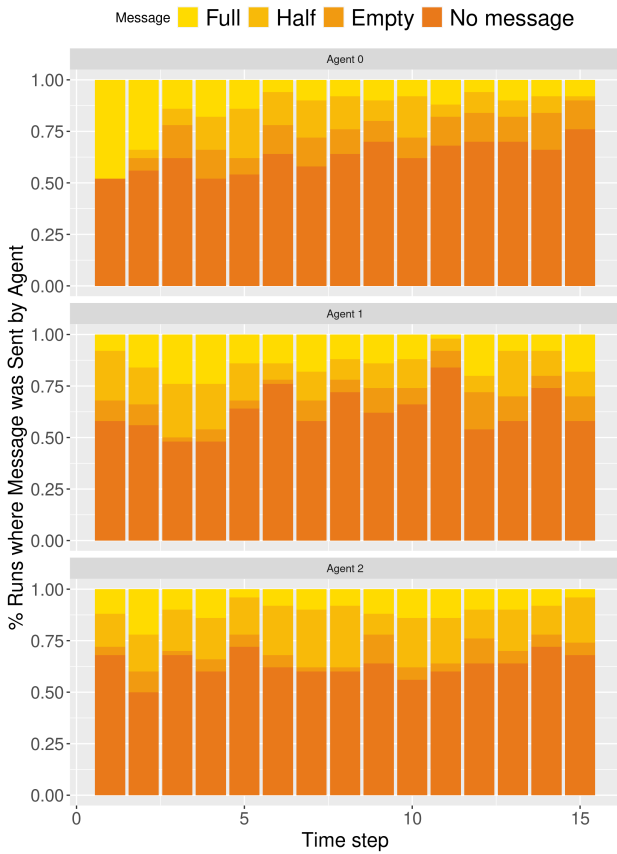

Figure 20: Messages sent using CI-POMCP-PF (cost = 1) in Setup 2

Messages Sent across Time for CI-POMCP-PF - Setup 3

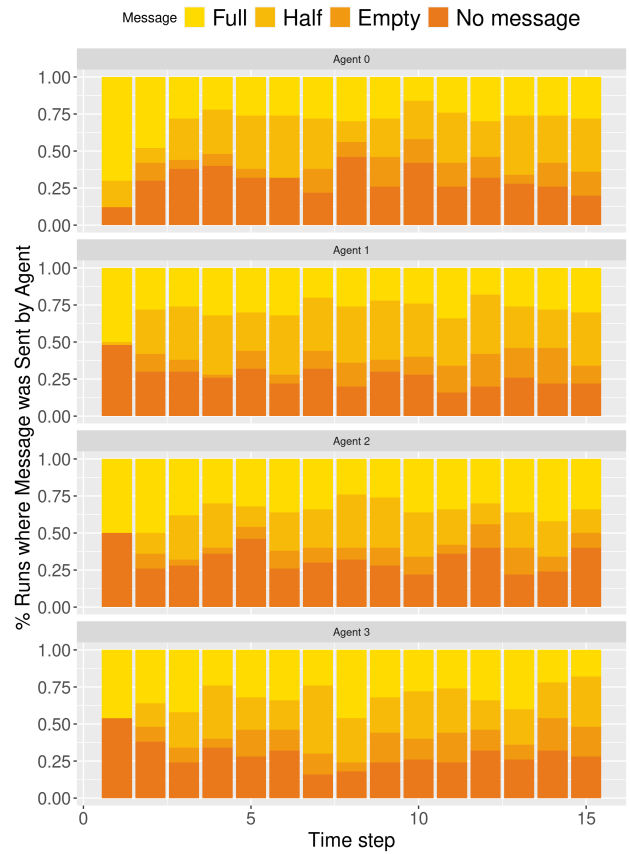

Figure 21: Messages sent using CI-POMCP-PF (cost = 0) in Setup 3

### Messages Sent across Time for CI-POMCP-PF - Setup 3

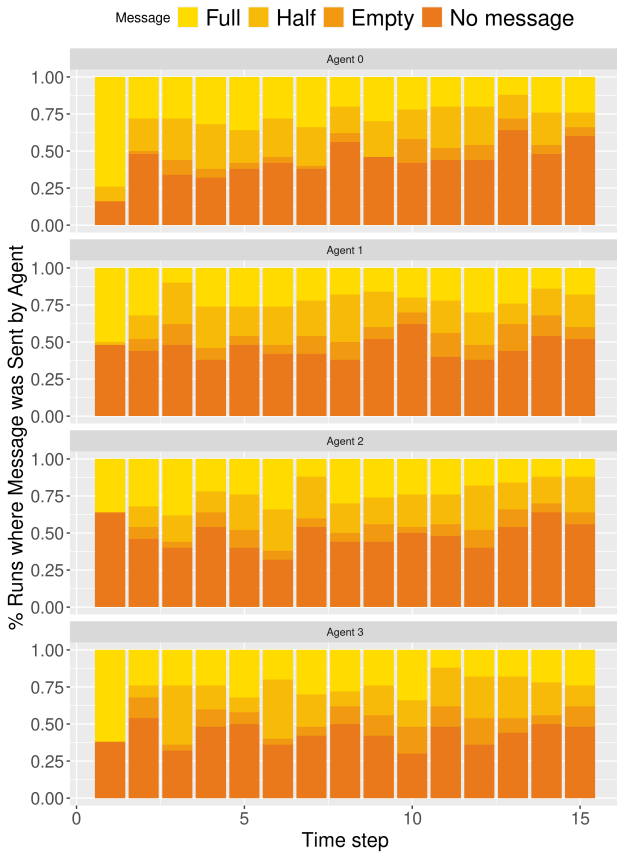

Figure 22: Messages sent using CI-POMCP-PF (cost = 1) in Setup 3
